# Supplementary material
Source: publisher figshare collection journal article supplement (https://acs.figshare.com/ndownloader/files/4061458)
Supplement: Supplementary file 1 [file 4061458]

data_final
_audit_creation_date              2012-11-19
_audit_creation_method
;
  Olex2 1.2-alpha
  (compiled 2012.02.07 svn.r2199, GUI svn.r4069)
;
_publ_contact_author_address      ?
_publ_contact_author_email        ?
_publ_contact_author_name         ''
_publ_contact_author_phone        ?
_chemical_name_common             ?
_chemical_name_systematic         4-fluorotoluene
_chemical_formula_moiety          'C7 H7 F'
_chemical_formula_sum             'C7 H7 F'
_chemical_formula_weight          110.13
_chemical_melting_point           ?
loop_
  _atom_type_symbol
  _atom_type_description
  _atom_type_scat_dispersion_real
  _atom_type_scat_dispersion_imag
  _atom_type_scat_source
 'C' 'C' 0.0033 0.0016 'International Tables Vol C Tables 4.2.6.8 and 6.1.1.4'
 'H' 'H' 0.0000 0.0000 'International Tables Vol C Tables 4.2.6.8 and 6.1.1.4'
 'F' 'F' 0.0171 0.0103 'International Tables Vol C Tables 4.2.6.8 and 6.1.1.4'

_space_group_crystal_system       'monoclinic'
_space_group_IT_number            14
_space_group_name_H-M_alt         'P 1 21/n 1'
_space_group_name_Hall            '-P 2yn'
loop_
  _space_group_symop_id
  _space_group_symop_operation_xyz
 1 'x, y, z'
 2 '-x+1/2, y+1/2, -z+1/2'
 3 '-x, -y, -z'
 4 'x-1/2, -y-1/2, z-1/2'

_cell_length_a                    7.452(6)
_cell_length_b                    5.987(6)
_cell_length_c                    14.693(17)
_cell_angle_alpha                 90.00
_cell_angle_beta                  104.00(3)
_cell_angle_gamma                 90.00
_cell_volume                      636.1(11)
_cell_formula_units_Z             4
_cell_measurement_reflns_used     398
_cell_measurement_temperature     217
_cell_measurement_theta_max       21.37
_cell_measurement_theta_min       2.86
_exptl_absorpt_coefficient_mu     0.086
_exptl_absorpt_correction_T_max   0.7447
_exptl_absorpt_correction_T_min   0.5495
_exptl_absorpt_correction_type    multi-scan
_exptl_absorpt_process_details
;
SADABS-2008/1 (Bruker,2008) was used for absorption correction.
R(int) was 0.0635 before and 0.0330 after correction.
The Ratio of minimum to maximum transmission is 0.7379.
The \l/2 correction factor is 0.0015.
;
_exptl_crystal_colour             'light colourless'
_exptl_crystal_colour_modifier    light
_exptl_crystal_colour_primary     colourless
_exptl_crystal_density_diffrn     1.150
_exptl_crystal_density_meas       .
_exptl_crystal_density_method     'not measured'
_exptl_crystal_description        Needle
_exptl_crystal_F_000              232
_exptl_crystal_recrystallization_method 'Cryo-crystallised in a Lindemann tube.'
_exptl_crystal_size_max           0.5
_exptl_crystal_size_mid           0.2
_exptl_crystal_size_min           0.1
_exptl_special_details
;
 The data collection nominally covered a full sphere of reciprocal space by
 a combination of 5 sets of \w scans each set at different \f and/or
 2\q angles and each scan (10 s exposure) covering -0.300\% degrees in \w.
 The crystal to detector distance was 4.424 cm.
;
_diffrn_reflns_av_R_equivalents   0.0236
_diffrn_reflns_av_unetI/netI      0.0336
_diffrn_reflns_limit_h_max        5
_diffrn_reflns_limit_h_min        -5
_diffrn_reflns_limit_k_max        4
_diffrn_reflns_limit_k_min        -5
_diffrn_reflns_limit_l_max        13
_diffrn_reflns_limit_l_min        -7
_diffrn_reflns_number             1071
_diffrn_reflns_theta_full         21.43
_diffrn_reflns_theta_max          21.43
_diffrn_reflns_theta_min          2.86
_diffrn_ambient_temperature       217
_diffrn_detector                  'CCD area detector'
_diffrn_detector_area_resol_mean  7.9
_diffrn_detector_type             'Bruker SMART CCD 1K area detector'
_diffrn_measured_fraction_theta_full 0.738
_diffrn_measured_fraction_theta_max 0.738
_diffrn_measurement_device        'three-circle diffractometer'
_diffrn_measurement_device_type   'Bruker SMART CCD 1K area detector'
_diffrn_measurement_method        '\w scans'
_diffrn_radiation_monochromator   graphite
_diffrn_radiation_probe           x-ray
_diffrn_radiation_type            MoK\a
_diffrn_radiation_wavelength      0.71073
_diffrn_radiation_xray_symbol     K-L~3~
_diffrn_source                    'sealed X-ray tube'
_diffrn_source_current            35.0
_diffrn_source_power              1.75
_diffrn_source_target             Mo
_diffrn_source_voltage            50.0
_diffrn_special_details
'Completeness limited as only omega scan with fixed phi and chi possible as sample mounted to the omega circle vertically to avoid icing of the Lindemann tube.'
_diffrn_standards_decay_%         ?
_diffrn_standards_interval_count  ?
_diffrn_standards_interval_time   ?
_diffrn_standards_number          0
_reflns_number_gt                 354
_reflns_number_total              534
_reflns_threshold_expression      >2sigma(I)
_computing_cell_refinement        ?
_computing_data_collection        'SMART v5.049 (Bruker, 1999)'
_computing_data_reduction         ?
_computing_molecular_graphics
;
O. V. Dolomanov, L. J. Bourhis, R. J. Gildea, J. A. K. Howard and H. Puschmann,
OLEX2: a complete structure solution, refinement and analysis program.
J. Appl. Cryst. (2009). 42, 339-341.
;
_computing_publication_material
;
O. V. Dolomanov, L. J. Bourhis, R. J. Gildea, J. A. K. Howard and H. Puschmann,
OLEX2: a complete structure solution, refinement and analysis program.
J. Appl. Cryst. (2009). 42, 339-341.
;
_computing_structure_refinement
;
XL, G.M. Sheldrick, Acta Cryst.
(2008). A64, 112-122
;
_computing_structure_solution
;
XS, G.M. Sheldrick, Acta Cryst.
(2008). A64, 112-122
;
_refine_diff_density_max          0.127
_refine_diff_density_min          -0.112
_refine_diff_density_rms          0.030
_refine_ls_extinction_coef        ?
_refine_ls_extinction_method      none
_refine_ls_goodness_of_fit_ref    1.031
_refine_ls_hydrogen_treatment     mixed
_refine_ls_matrix_type            full
_refine_ls_number_parameters      74
_refine_ls_number_reflns          534
_refine_ls_number_restraints      0
_refine_ls_R_factor_all           0.0753
_refine_ls_R_factor_gt            0.0474
_refine_ls_restrained_S_all       1.031
_refine_ls_shift/su_max           0.001
_refine_ls_shift/su_mean          0.000
_refine_ls_structure_factor_coef  Fsqd
_refine_ls_weighting_details
'calc w=1/[\s^2^(Fo^2^)+(0.0714P)^2^+0.1646P] where P=(Fo^2^+2Fc^2^)/3'
_refine_ls_weighting_scheme       calc
_refine_ls_wR_factor_gt           0.1203
_refine_ls_wR_factor_ref          0.1384
_refine_special_details
;
 Refinement of F^2^ against ALL reflections.  The weighted R-factor wR and 
 goodness of fit S are based on F^2^, conventional R-factors R are based 
 on F, with F set to zero for negative F^2^. The threshold expression of 
 F^2^ > 2sigma(F^2^) is used only for calculating R-factors(gt) etc. and is 
 not relevant to the choice of reflections for refinement.  R-factors based 
 on F^2^ are statistically about twice as large as those based on F, and R- 
 factors based on ALL data will be even larger. 
;
_olex2_refinement_description
;
1. Others
 Fixed Uiso: H4(0.067) H1(0.074) H3(0.077) H2(0.078) H6(0.131) H5(0.131)
 H7(0.131)
 Fixed X: H4(0.6445) H1(0.4956) H3(0.496) H2(0.3446) H6(0.6322) H5(0.8139)
 H7(0.6701)
 Fixed Y: H4(0.3303) H1(-0.2327) H3(0.2121) H2(-0.3518) H6(0.2806) H5(0.1619)
 H7(0.0315)
 Fixed Z: H4(0.7618) H1(0.8701) H3(0.6118) H2(0.7211) H6(0.9439) H5(0.9337)
 H7(0.9757)
;
_atom_sites_solution_hydrogens    geom
_atom_sites_solution_primary      direct
_atom_sites_solution_secondary    difmap
loop_
  _atom_site_label
  _atom_site_type_symbol
  _atom_site_fract_x
  _atom_site_fract_y
  _atom_site_fract_z
  _atom_site_U_iso_or_equiv
  _atom_site_adp_type
  _atom_site_occupancy
  _atom_site_symmetry_multiplicity
  _atom_site_calc_flag
  _atom_site_refinement_flags
  _atom_site_disorder_assembly
  _atom_site_disorder_group
 C6 C 0.5845(5) 0.1929(5) 0.7540(2) 0.0555(12) Uani 1 1 d . . .
 H4 H 0.6445 0.3303 0.7618 0.067 Uiso 1 1 calc R . .
 F1 F 0.3190(4) -0.1506(4) 0.56509(14) 0.1103(12) Uani 1 1 d . . .
 C2 C 0.4955(6) -0.1423(6) 0.8186(2) 0.0619(12) Uani 1 1 d . . .
 H1 H 0.4956 -0.2327 0.8701 0.074 Uiso 1 1 calc R . .
 C5 C 0.4957(6) 0.1240(6) 0.6639(2) 0.0644(12) Uani 1 1 d . . .
 H3 H 0.4960 0.2121 0.6118 0.077 Uiso 1 1 calc R . .
 C1 C 0.5863(5) 0.0632(6) 0.8325(2) 0.0529(11) Uani 1 1 d . . .
 C4 C 0.4071(6) -0.0805(7) 0.6548(2) 0.0661(12) Uani 1 1 d . . .
 C3 C 0.4051(5) -0.2147(6) 0.7296(3) 0.0647(13) Uani 1 1 d . . .
 H2 H 0.3446 -0.3518 0.7211 0.078 Uiso 1 1 calc R . .
 C7 C 0.6847(6) 0.1415(6) 0.9305(2) 0.0876(15) Uani 1 1 d . . .
 H6 H 0.6322 0.2806 0.9439 0.131 Uiso 1 1 calc R . .
 H5 H 0.8139 0.1619 0.9337 0.131 Uiso 1 1 calc R . .
 H7 H 0.6701 0.0315 0.9757 0.131 Uiso 1 1 calc R . .

loop_
  _atom_site_aniso_label
  _atom_site_aniso_U_11
  _atom_site_aniso_U_22
  _atom_site_aniso_U_33
  _atom_site_aniso_U_23
  _atom_site_aniso_U_13
  _atom_site_aniso_U_12
 C6 0.056(4) 0.041(2) 0.071(2) 0.0030(18) 0.0180(19) -0.0021(17)
 F1 0.105(3) 0.120(2) 0.0933(18) -0.0271(14) -0.0009(14) -0.0173(16)
 C2 0.060(3) 0.056(3) 0.077(3) 0.0100(19) 0.032(2) 0.001(2)
 C5 0.067(4) 0.057(3) 0.069(3) 0.0125(19) 0.016(2) -0.003(2)
 C1 0.047(3) 0.048(2) 0.068(2) -0.0010(18) 0.0222(16) -0.0008(17)
 C4 0.055(4) 0.074(3) 0.066(3) -0.015(2) 0.0079(19) 0.002(2)
 C3 0.050(4) 0.043(2) 0.106(3) -0.006(2) 0.029(2) -0.0063(18)
 C7 0.093(4) 0.103(3) 0.068(3) -0.006(2) 0.021(2) -0.012(3)

_geom_special_details
;
 All esds (except the esd in the dihedral angle between two l.s. planes) 
 are estimated using the full covariance matrix.  The cell esds are taken 
 into account individually in the estimation of esds in distances, angles 
 and torsion angles; correlations between esds in cell parameters are only 
 used when they are defined by crystal symmetry.  An approximate (isotropic) 
 treatment of cell esds is used for estimating esds involving l.s. planes. 
;
loop_
  _geom_bond_atom_site_label_1
  _geom_bond_atom_site_label_2
  _geom_bond_distance
  _geom_bond_site_symmetry_2
  _geom_bond_publ_flag
 C6 C5 1.391(4) . ?
 C6 C1 1.388(4) . ?
 F1 C4 1.388(4) . ?
 C2 C1 1.395(5) . ?
 C2 C3 1.388(5) . ?
 C5 C4 1.382(5) . ?
 C1 C7 1.523(4) . ?
 C4 C3 1.364(5) . ?

loop_
  _geom_angle_atom_site_label_1
  _geom_angle_atom_site_label_2
  _geom_angle_atom_site_label_3
  _geom_angle
  _geom_angle_site_symmetry_1
  _geom_angle_site_symmetry_3
  _geom_angle_publ_flag
 C1 C6 C5 122.1(3) . . ?
 C3 C2 C1 121.4(3) . . ?
 C4 C5 C6 117.5(3) . . ?
 C6 C1 C2 117.7(3) . . ?
 C6 C1 C7 121.3(3) . . ?
 C2 C1 C7 121.0(3) . . ?
 C5 C4 F1 117.7(4) . . ?
 C3 C4 F1 119.5(4) . . ?
 C3 C4 C5 122.8(3) . . ?
 C4 C3 C2 118.5(3) . . ?
